# Supplementary material for: PCB: A pseudotemporal causality-based Bayesian approach to identify EMT-associated regulatory relationships of AS events and RBPs during breast cancer progression
Source: PLoS Comput Biol. 2023 Mar 17;19(3):e1010939. doi: 10.1371/journal.pcbi.1010939 (PMC10057809; doi:10.1371/journal.pcbi.1010939)
Supplement: S3 Table — (XLSX) [file pcbi.1010939.s006.xlsx]

## Sheet: Sheet1
sampleID	pathologic_M	pathologic_N	pathologic_T	pathologic_stage
TCGA-BH-A0C7-01	M0	N1mi	T2	Stage IIB
TCGA-A8-A06N-01	M0	N0	T4b	Stage IIIB
TCGA-D8-A1XV-01	M0	N0	T2	Stage IIA
TCGA-E9-A1N3-01	M0	N2	T1c	Stage IIIA
TCGA-A2-A0CW-01	M0	N1a	T2	Stage IIB
TCGA-A1-A0SQ-01	MX	N1	T2	Stage IIB
TCGA-C8-A1HM-01	M0	N0	T2	Stage IIA
TCGA-D8-A1XG-01	M0	N1a	T4b	Stage IIIB
TCGA-BH-A6R8-01	M0	N0	T2	Stage IIA
TCGA-E9-A5UO-01	M0	N0	T2	Stage IIA
TCGA-D8-A1XA-01	M0	N0	T1c	Stage IA
TCGA-E2-A15G-01	M0	N0	T2	Stage IIA
TCGA-BH-A18R-01	M0	N1	T2b	Stage IIA
TCGA-C8-A26Z-01	M0	N0	T2	Stage IIA
TCGA-B6-A1KN-01	M0	N1	T4b	Stage IIIB
TCGA-A7-A0DC-01	M0	N0 (i-)	T1c	Stage IA
TCGA-A8-A09E-01	M0	N1a	T4b	Stage IIIB
TCGA-AR-A24Z-01	M0	N0	T2	Stage IIA
TCGA-AN-A0FK-01	M0	N0	T4	Stage IIIB
TCGA-AO-A03M-01	M0	N0 (i-)	T1c	Stage I
TCGA-A2-A0YG-01	M0	N3a	T2	Stage IIIC
TCGA-EW-A1P5-01	M0	N1a	T2	Stage IIB
TCGA-E2-A15S-01	M0	N1	T2	Stage IIB
TCGA-C8-A12X-01	M0	N1	T2	Stage IIB
TCGA-A2-A0EU-01	M0	N0 (i-)	T1c	Stage IA
TCGA-BH-A0W3-01	M0	N1a	T1c	Stage IIA
TCGA-E2-A109-01	M0	N0 (i-)	T2	Stage IIA
TCGA-A2-A0YT-01	M0	N2a	T4b	Stage IIIB
TCGA-A8-A09K-01	M0	N1	T1c	Stage IIA
TCGA-S3-AA11-01	M0	N0	T2	Stage IIA
TCGA-OL-A5RZ-01	MX	N0	T1b	Stage IA
TCGA-BH-A0H9-01	M0	N0 (i-)	T2	Stage IIA
TCGA-E9-A1R2-01	MX	N3	T2	Stage IIIC
TCGA-A8-A06Z-01	M0	N0	T3	Stage IIB
TCGA-AR-A1AV-01	M0	N1	T2	Stage IIB
TCGA-A8-A06Y-01	M0	N0	T2	Stage IIA
TCGA-EW-A6SA-01
TCGA-A2-A0D1-01	M0	N0 (i-)	T2	Stage IIA
TCGA-B6-A0RL-01	M0	N0 (i-)	T2	Stage IIA
TCGA-D8-A27E-01	M0	N0	T1c	Stage IA
TCGA-E9-A5UP-01	M0	N0	T2	Stage IIA
TCGA-D8-A1JM-01	M0	N1a	T2	Stage IIB
TCGA-BH-A0E7-01	M0	N1a	T2	Stage IIB
TCGA-BH-A1F8-01	M0	N2	T4b	Stage IIIB
TCGA-E2-A155-01	M0	N1a	T2	Stage IIB
TCGA-AR-A0U3-01	M0	N1	T2	Stage IIB
TCGA-A8-A085-01	M0	N1a	T2	Stage IIB
TCGA-C8-A12L-01	M0	N0 (i-)	T2	Stage IIA
TCGA-E2-A156-01	M0	N0	T1c	Stage I
TCGA-A2-A0EY-01	M0	N1a	T2	Stage IIB
TCGA-E2-A10B-01	M0	N1a	T2	Stage IIB
TCGA-BH-A0HL-01	M0	N1a	T2	Stage IIB
TCGA-A2-A25E-01	M0	N2a	T2	Stage IIIA
TCGA-C8-A27A-01	M0	N1	T2	Stage IIB
TCGA-AO-A12H-01	M0	N0 (i-)	T2	Stage IIA
TCGA-BH-A0HN-01	M0	N0 (i-)	T1c	Stage IA
TCGA-AN-A0FZ-01	M0	N2	T2	Stage IIIA
TCGA-AR-A24R-01	M0	N2	T1	Stage IIIA
TCGA-D8-A1XF-01	M0	N0	T2	Stage IIA
TCGA-3C-AAAU-01	MX	NX	TX	Stage X
TCGA-EW-A1OY-01	MX	N0	T2	Stage IIA
TCGA-B6-A0X4-01	M0	N1b	T2	Stage IIB
TCGA-EW-A1PF-01	M0	N0	T1c	Stage IA
TCGA-C8-A12U-01	M0	N1	T2	Stage IIB
TCGA-E2-A105-01	M0	N0 (i-)	T2	Stage IIA
TCGA-LL-A442-01	MX	N0 (i-)	T2	Stage IIA
TCGA-EW-A1J1-01	M0	N1a	T2	Stage IIB
TCGA-D8-A1JA-01	M0	NX	T4b
TCGA-A8-A09C-01	MX	N0	T2	Stage X
TCGA-C8-A12M-01	M0	N0 (i-)	T2	Stage IIA
TCGA-C8-A1HK-01	M0	N1	T2	Stage IIB
TCGA-A8-A07Z-01	M0	N0	T2	Stage IIA
TCGA-AN-A04C-01	M0	N1	T2	Stage IIB
TCGA-AR-A0TZ-01	M1	N2	T2	Stage IIIA
TCGA-A8-A06U-01	M0	N1a	T2	Stage IIB
TCGA-A8-A06Q-01	M0	N2	T3	Stage IIIA
TCGA-E2-A15A-01	M0	N3a	T2	Stage IIIC
TCGA-B6-A1KC-01	M0	N1	T2	Stage IIA
TCGA-BH-A18L-01	M0	N1mi	T3	Stage IIIA
TCGA-A7-A0D9-01	M0	N0 (i-)	T2	Stage IIA
TCGA-AN-A041-01	M0	N1a	T2	Stage IIB
TCGA-A2-A0D4-01	M0	N1a	T2	Stage IIB
TCGA-BH-A18S-01	M0	N0	T1c	Stage I
TCGA-BH-A0BW-01	M0	N0	T1c	Stage I
TCGA-A2-A04T-01	M0	N0 (i-)	T2	Stage IIA
TCGA-A7-A13F-01	M0	N1a	T3	Stage IIIA
TCGA-UL-AAZ6-01	MX	N0	T2	Stage IIA
TCGA-B6-A0RG-01	M0	N0 (i-)	T3	Stage IIB
TCGA-A2-A4S0-01	M0	N0	T2	Stage IIA
TCGA-AR-A0TW-01	M0	N1	T3	Stage IIIA
TCGA-A1-A0SJ-01	M0	N1a	T3	Stage IIIA
TCGA-BH-A0DD-01	M0	N1a	T2	Stage IIB
TCGA-A2-A1FW-01	M0	N2a	T3	Stage IIIA
TCGA-B6-A0RO-01	M0	N1a	T4	Stage IIIB
TCGA-E2-A1LB-01	M0	N1	T2	Stage IIB
TCGA-B6-A0IE-01	M0	N1b	TX	Stage Tis
TCGA-E2-A15E-06	M0	N1a	T1c	Stage IIA
TCGA-BH-A1ES-06	M0	N1a	T2	Stage IIB
TCGA-AC-A23H-01	M0	NX	T2	Stage IIA
TCGA-AO-A03V-01	M0	N0 (i-)	T1c	Stage I
TCGA-D8-A27W-01	M0	N0	T4b	Stage IIIB
TCGA-5T-A9QA-01	MX	NX	T2	Stage IIA
TCGA-E2-A14V-01	M0	N1	T2	Stage IIB
TCGA-BH-A0H0-01	M0	N0 (i-)	T1c	Stage IA
TCGA-B6-A0IK-01	M0	N1	T4	Stage IIIB
TCGA-A2-A0CU-01	M0	N0 (i+)	T2	Stage IIA
TCGA-A2-A0ER-01	M0	N1mi	T1c	Stage IB
TCGA-B6-A0I9-01	M1	NX	T3	Stage IV
TCGA-AO-A0J3-01	M0	N1b	T2	Stage IIB
TCGA-C8-A1HO-01	M0	N3	T3	Stage IIIC
TCGA-B6-A0X5-01	M0	N1b	T2	Stage IIB
TCGA-A8-A083-01	M0	N0	T3	Stage IIB
TCGA-B6-A0I8-01	M0	NX	T1	Stage X
TCGA-C8-A273-01	M0	N1	T2	Stage IIB
TCGA-AR-A0TY-01	M0	N0	T2	Stage IIA
TCGA-BH-A1FJ-01	M0	N1b	T3	Stage IIIA
TCGA-BH-A0HW-01	M0	N0 (i-)	T1c	Stage IA
TCGA-D8-A140-01	M0	N1a	T2	Stage IIB
TCGA-C8-A133-01	M0	N1	T3	Stage IIIA
TCGA-B6-A0IC-01	MX	NX	T2	Stage X
TCGA-D8-A1XC-01	M0	N1a	T4b	Stage IIIB
TCGA-A8-A081-01	M0	N0	T2	Stage IIA
TCGA-A8-A08L-01	M0	N2a	T3	Stage IIIA
TCGA-A2-A0CT-01	M0	N0 (i-)	T2	Stage IIA
TCGA-D8-A27R-01	M0	N3a	T2	Stage IIIC
TCGA-E9-A1R7-01	M0	N0	T2	Stage IIA
TCGA-B6-A0WV-01	M0	N1b	T2	Stage IIB
TCGA-A2-A0ET-01	M0	N2a	T2	Stage IIIA
TCGA-E2-A15A-06	M0	N3a	T2	Stage IIIC
TCGA-AQ-A04H-01	MX	N2a	T2	Stage IIIA
TCGA-A2-A25C-01	M0	N1a	T2	Stage IIB
TCGA-E2-A106-01	M0	N1mi	T1c	Stage IB
TCGA-AR-A0TR-01	M0	N1	T2	Stage IIB
TCGA-AN-A0AK-01	M0	N0	T2	Stage IIA
TCGA-A2-A0YF-01	M0	N0 (i+)	T1b	[Discrepancy]
TCGA-E2-A1IE-01	M0	N1	T2	Stage IIB
TCGA-A7-A4SF-01	M0	N0	T2	Stage IIA
TCGA-E2-A14P-01	M0	N3	T2	Stage IIIC
TCGA-S3-A6ZH-01	MX	N3a	T3	Stage IIIC
TCGA-B6-A0IO-01	M0	N0 (i-)	T2	Stage IIA
TCGA-BH-A0BS-01	M0	N1c	T3	Stage IIIA
TCGA-E9-A22H-01	M0	N1	T2	Stage IIB
TCGA-EW-A1OX-01	MX	N0	T2	Stage IIA
TCGA-AN-A03Y-01	M0	N0	T2	Stage IIA
TCGA-A7-A0CH-11	M0	N0 (i-)	T2	Stage IIA
TCGA-LL-A440-01	MX	N0 (i-)	T1c	Stage IA
TCGA-BH-A6R9-01	M0	N0	T2	Stage IIA
TCGA-AR-A5QN-01	M0	N3	T2	Stage IIIC
TCGA-A2-A04U-01	M0	N0 (i+)	T2	Stage IIA
TCGA-BH-A0HP-01	M0	N2a	T3	Stage IIIA
TCGA-5L-AAT1-01
TCGA-D8-A27T-01	M0	N3a	T2	Stage IIIC
TCGA-BH-A1EO-11	M0	N1	T1c	Stage IIA
TCGA-BH-A1EN-11	M0	NX	T2	Stage IIA
TCGA-AR-A5QM-01	M0	N0	T2	Stage IIA
TCGA-EW-A6SC-01
TCGA-E9-A1RB-11	M0	N0	T2	Stage IIA
TCGA-E9-A1RI-11	M0	N2	T1c	Stage IIIA
TCGA-XX-A899-01	MX	N2a	T1c	Stage IIIA
TCGA-GM-A3XN-01	M0	N2a	T1c	Stage IIIA
TCGA-A2-A0EP-01	M0	N0 (i+)	T1	Stage I
TCGA-AC-A3QP-01	MX	N1mi	T2	Stage IIB
TCGA-AR-A2LM-01	M0	N1	T1	Stage II
TCGA-BH-A28Q-01	M0	N1a	T2	Stage IIB
TCGA-BH-A0B8-11	M0	N0 (i-)	T1b	Stage I
TCGA-AQ-A7U7-01	M0	N2a	T2	Stage IIIA
TCGA-A7-A3IZ-01	M0	N0 (i+)	T2	Stage IIA
TCGA-AC-A3W6-01	MX	N1	T3	Stage IIIA
TCGA-E9-A1R7-11	M0	N0	T2	Stage IIA
TCGA-D8-A27G-01	M0	N0	T2	Stage IIA
TCGA-A2-A0EN-01	M0	N0 (i+)	T2	Stage IIA
TCGA-AC-A2FF-01	MX	N1	T2	Stage IIB
TCGA-S3-AA17-01	cM0 (i+)	N1mi	T2	Stage IIB
TCGA-AC-A23G-01	MX	N1	T1c	Stage IIA
TCGA-A8-A08H-01	M0	N0	T2	Stage IIA
TCGA-E2-A15M-01	M0	N0	T2	Stage IIA
TCGA-S3-A6ZG-01	M0	N1	T2	Stage IIB
TCGA-BH-A209-01	M0	N0	T1c	Stage I
TCGA-A7-A4SC-01	MX	N0	T3	Stage IIB
TCGA-AR-A24X-01	M0	N0	T2	Stage IIA
TCGA-D8-A73U-01	M0	N0	T2	Stage IIA
TCGA-A7-A13H-01	MX	N1a	T2	Stage IIB
TCGA-BH-A1FD-11	M0	N0	T1c	Stage I
TCGA-AO-A0J9-01	M0	N3	T2	Stage IIIC
TCGA-A8-A07B-01	M0	N0	T2	Stage IIA
TCGA-S3-AA0Z-01	M0	N1a	T2	Stage IIB
TCGA-E2-A158-11	M0	N1mi	T1c	Stage IIA
TCGA-A2-A0SY-01	M0	N1	T3	Stage IIIA
TCGA-D8-A27I-01	M0	N2a	T1c	Stage IIIA
TCGA-AR-A1AT-01	M0	N0	T2	Stage IIA
TCGA-A7-A6VV-01	M0	N0	T2	Stage IIA
TCGA-OL-A66K-01	MX	N0	T2	Stage IIA
TCGA-Z7-A8R6-01	M0	N0	T1c	Stage I
TCGA-BH-A18G-01	M0	N0	T1c	Stage IA
TCGA-E2-A15L-01	M0	N0	T2	Stage IIA
TCGA-E9-A1RH-11	M0	N0	T2	Stage IIA
TCGA-AC-A5XS-01	MX	N0	T2	Stage IIA
TCGA-D8-A1Y1-01	MX	N1a	T3	Stage IIIA
TCGA-D8-A3Z6-01	M0	N3a	T3	Stage IIIC
TCGA-GM-A3NW-01	M0	N0 (i-)	T2	Stage IIA
TCGA-E2-A2P6-01	M0	N1	T2	Stage IIB
TCGA-A8-A09W-01	M0	N3	T2	Stage IIIB
TCGA-A8-A09T-01	MX	N0	T1c	Stage X
TCGA-A2-A4S1-01	M0	N0	T2	Stage IIA
TCGA-AR-A24T-01	M0	N3	T3	Stage IIIC
TCGA-E2-A1B5-01	M0	N0	T2	Stage IIA
TCGA-BH-A18F-01	M0	N0	T2	Stage IIA
TCGA-OL-A66J-01	MX	N0	T1c	Stage I
TCGA-XX-A89A-01	MX	N0	T3	Stage IIB
TCGA-BH-A8G0-01	M0	N1a	T2	Stage IIB
TCGA-E9-A1RC-11	M0	N3	T4b	Stage IIIC
TCGA-AC-A3EH-01
TCGA-E9-A3X8-01	M0	N1	T2	Stage IIB
TCGA-E9-A1NG-11	M0	N0	T2	Stage IIA
TCGA-A2-A0YD-01	M0	N0 (i+)	T3	Stage IIB
TCGA-WT-AB44-01	MX	N0 (i-)	T1c	Stage IA
TCGA-AR-A2LL-01	M0	N0	T3	Stage IIB
TCGA-A2-A0CK-01	M0	N2a	T3	Stage IIIA
TCGA-BH-A1FL-01	M0	N1b	T2	Stage IIB
TCGA-AN-A0FN-01	M0	N0	T1c	Stage IB
TCGA-AR-A2LQ-01	M0	N0	T3	Stage IIB
TCGA-A2-A0CO-01	M0	N0	T3	Stage IIB
TCGA-A7-A0D9-11	M0	N0 (i-)	T2	Stage IIA
TCGA-EW-A1OV-01	MX	N1mi	T2	Stage IIB
TCGA-E2-A2P5-01	M0	N3	T2	Stage IIIC
TCGA-4H-AAAK-01	M0	N2a	T2	Stage IIIA
TCGA-A8-A0A9-01	M0	N0	T2	Stage IIA
TCGA-A2-A4RW-01	M0	N3a	T2	Stage IIIC
TCGA-GM-A5PX-01	M0	N1mi	T2	Stage IIB
TCGA-BH-A0DD-11	M0	N1a	T2	Stage IIB
TCGA-GI-A2C8-11	MX	N0	T4b	Stage IIIB
TCGA-A2-A25D-01	M0	N3a	T2	Stage IIIC
TCGA-E9-A5FK-01	M0	N3	T2	Stage IIIC
TCGA-A2-A0CR-01	M0	N0	T3	Stage IIB
TCGA-B6-A40B-01	M0	N0 (i-)	T1b	Stage I
TCGA-AR-A24O-01	M0	N2	T3	Stage IIIA
TCGA-AC-A8OS-01	MX	N0 (i-)	T2	Stage IIA
TCGA-AO-A0JC-01	M0	N0 (i-)	T2	Stage IIA
TCGA-A2-A0EX-01	M0	N0 (i+)	T3	Stage IIB
TCGA-A7-A13E-11	MX	N1	T2	Stage IIB
TCGA-E2-A1BC-11	M0	N0	T1c	Stage IA
TCGA-E9-A3HO-01	M0	N0 (i-)	T2	Stage IIA
TCGA-AO-A12G-01	M0	N0 (i+)	T2	Stage IIA
TCGA-B6-A0RN-01	M0	N0 (i-)	T1c	Stage IA
TCGA-E9-A1ND-11	M0	N1	T2	Stage IIB
TCGA-A7-A0DB-11	M0	N0 (i-)	T2	Stage IIA
TCGA-LD-A74U-01	M0	N3a	T3	Stage IIIC
TCGA-LL-A9Q3-01	MX	N3a	T3	Stage IIIC
TCGA-E9-A1RF-11	M0	N2	T2	Stage IIIA
TCGA-E2-A10F-01	M0	N0 (i-)	T2	Stage IIA
TCGA-E2-A15K-11	M0	N1a	T2	Stage IIA
TCGA-GM-A4E0-01	M0	N3a	T3	Stage IIIC
TCGA-E2-A1LS-11	M0	N0	T1c	Stage IA
TCGA-AC-A3HN-01	MX	N1a	T2	Stage IIB
TCGA-AC-A6IV-01	MX	N1	T2	Stage IIB
TCGA-S3-AA15-01	cM0 (i+)	N1a	T2	Stage IIB
TCGA-AC-A2QH-01	MX	N0	T3	Stage IIB
TCGA-AC-A3TM-01
TCGA-A8-A07F-01	M0	N1a	T2	Stage IIB
TCGA-BH-A0B2-01	M0	N0	T1a	Stage I
TCGA-A8-A09X-01	M0	N3a	T2	Stage IIIC
TCGA-A2-A1FV-01	M0	N0 (i+)	T3	Stage IIB
TCGA-HN-A2NL-01	M0	N0	T2	Stage IIA
TCGA-BH-A204-11	M0	N1b	T2	Stage IIB
TCGA-E9-A1NF-11	M0	N0	T2	Stage IIA
TCGA-A7-A13G-11	MX	N0	T2	Stage IIA
TCGA-AC-A2QJ-01	M0	N0	T4b	Stage IIIB
TCGA-D8-A1X8-01	M0	N2a	T1c	Stage IIIA
TCGA-AC-A3TN-01	MX	N0	T3	Stage IIB
TCGA-E2-A1IH-01	M0	N0	T1c	Stage I
TCGA-HN-A2OB-01	M0	N1	T2	Stage IIB
TCGA-BH-A1FE-06	M0	N1	T2	Stage IIB
TCGA-OL-A5DA-01	MX	N0	T2	Stage IIA
TCGA-BH-A0B5-11	M0	N2a	T2	Stage IIIA
TCGA-OL-A66N-01	MX	N3	T3	Stage IIIC
TCGA-A2-A0T4-01	M0	N0 (i-)	T2	Stage IIA
TCGA-A7-A4SA-01	M0	N1a	T2	Stage IIB
TCGA-AC-A6IX-06	MX	N3a	T2	Stage IIIC
TCGA-AC-A6IX-01	MX	N3a	T2	Stage IIIC
TCGA-LL-A5YL-01	MX	N1a	T2	Stage IIB
TCGA-AC-A7VC-01	MX	N0	T3	Stage IIB
TCGA-OL-A5S0-01	MX	N1a	T2	Stage IIB
TCGA-E9-A6HE-01	MX	N3	T3	Stage IIIC
TCGA-E2-A1L8-01	M0	N1a	T2	Stage IIA
TCGA-OL-A66L-01	MX	N0	T1c	Stage IA
TCGA-EW-A1J2-01	MX	N1mi	T1c	Stage IIB
TCGA-A7-A3J1-01	MX	N0	T1c	Stage IA
TCGA-AO-A0J8-01	M0	N0 (i+)	T2	Stage IIA
TCGA-E2-A576-01	MX	N0	T1c	Stage IA
TCGA-B6-A0X7-01	MX	NX	T1c	Stage X
TCGA-AO-A0JJ-01	M0	N1a	T2	Stage IIB
TCGA-E2-A3DX-01	M0	N3	T2	Stage IIIC
TCGA-A8-A0AB-01	M0	N0	T2	Stage IIA
TCGA-E9-A1RD-11	M0	N0	T2	Stage IIA
TCGA-E2-A15I-11	M0	N0	T2	Stage IIA
TCGA-PE-A5DD-01	M0	N0	T2	Stage IIA
TCGA-A8-A0A1-01	M0	N0	T2	Stage IIA
TCGA-E2-A1IJ-01	M0	N0	T1c	Stage I
TCGA-BH-A0C1-01	M0	N2a	T3	Stage IIIA
TCGA-LQ-A4E4-01	MX	N1a	T3	Stage IIIA
