# Supplementary material for: PCB: A pseudotemporal causality-based Bayesian approach to identify EMT-associated regulatory relationships of AS events and RBPs during breast cancer progression
Source: PLoS Comput Biol. 2023 Mar 17;19(3):e1010939. doi: 10.1371/journal.pcbi.1010939 (PMC10057809; doi:10.1371/journal.pcbi.1010939)
Supplement: S4 Table — (XLSX) [file pcbi.1010939.s007.xlsx]

## Sheet: Sheet1
specimen	PD score	EMT	pathologic_M	pathologic_N	pathologic_T	pathologic_stage
'TCGA-D8-A1XC-01'	0	1	M0	N1a	T4b	Stage IIIB
'TCGA-E9-A1N3-01'	0.0156523	1	M0	N2	T1c	Stage IIIA
'TCGA-D8-A1XV-01'	0.0182844	1	M0	N0	T2	Stage IIA
'TCGA-B6-A0IC-01'	0.0184955	1	MX	NX	T2	Stage X
'TCGA-D8-A27E-01'	0.0186023	1	M0	N0	T1c	Stage IA
'TCGA-A8-A06N-01'	0.0188476	1	M0	N0	T4b	Stage IIIB
'TCGA-AR-A0TR-01'	0.0192195	1	M0	N1	T2	Stage IIB
'TCGA-B6-A0X4-01'	0.0193411	1	M0	N1b	T2	Stage IIB
'TCGA-EW-A1OX-01'	0.019385	1	MX	N0	T2	Stage IIA
'TCGA-BH-A0W3-01'	0.0194738	1	M0	N1a	T1c	Stage IIA
'TCGA-A2-A4S0-01'	0.019678	1	M0	N0	T2	Stage IIA
'TCGA-A8-A09K-01'	0.0203723	1	M0	N1	T1c	Stage IIA
'TCGA-E2-A156-01'	0.0209772	1	M0	N0	T1c	Stage I
'TCGA-BH-A18L-01'	0.0209928	1	M0	N1mi	T3	Stage IIIA
'TCGA-E2-A155-01'	0.0210544	1	M0	N1a	T2	Stage IIB
'TCGA-BH-A1FJ-01'	0.0220064	1	M0	N1b	T3	Stage IIIA
'TCGA-D8-A1XF-01'	0.0220809	1	M0	N0	T2	Stage IIA
'TCGA-A2-A0YT-01'	0.0223471	1	M0	N2a	T4b	Stage IIIB
'TCGA-E9-A1R7-01'	0.0224684	1	M0	N0	T2	Stage IIA
'TCGA-AO-A0J3-01'	0.0225947	1	M0	N1b	T2	Stage IIB
'TCGA-BH-A1F8-01'	0.0227937	1	M0	N2	T4b	Stage IIIB
'TCGA-B6-A1KC-01'	0.0230607	1	M0	N1	T2	Stage IIA
'TCGA-E2-A15A-01'	0.0231595	1	M0	N3a	T2	Stage IIIC
'TCGA-BH-A0H0-01'	0.0232068	1	M0	N0 (i-)	T1c	Stage IA
'TCGA-BH-A18S-01'	0.0232186	1	M0	N0	T1c	Stage I
'TCGA-AR-A0TW-01'	0.0233207	1	M0	N1	T3	Stage IIIA
'TCGA-A7-A0DC-01'	0.0234006	1	M0	N0 (i-)	T1c	Stage IA
'TCGA-B6-A0WV-01'	0.0234057	1	M0	N1b	T2	Stage IIB
'TCGA-A8-A06Q-01'	0.0237573	1	M0	N2	T3	Stage IIIA
'TCGA-E9-A22H-01'	0.0237607	1	M0	N1	T2	Stage IIB
'TCGA-BH-A0E7-01'	0.0238312	1	M0	N1a	T2	Stage IIB
'TCGA-AQ-A04H-01'	0.023926	1	MX	N2a	T2	Stage IIIA
'TCGA-AR-A24R-01'	0.0239904	1	M0	N2	T1	Stage IIIA
'TCGA-C8-A1HO-01'	0.0241482	1	M0	N3	T3	Stage IIIC
'TCGA-A8-A06Z-01'	0.0242067	1	M0	N0	T3	Stage IIB
'TCGA-C8-A27A-01'	0.0242607	1	M0	N1	T2	Stage IIB
'TCGA-BH-A0BS-01'	0.0243742	1	M0	N1c	T3	Stage IIIA
'TCGA-A2-A25E-01'	0.024571	1	M0	N2a	T2	Stage IIIA
'TCGA-A2-A0YG-01'	0.0247384	1	M0	N3a	T2	Stage IIIC
'TCGA-C8-A12M-01'	0.0247744	1	M0	N0 (i-)	T2	Stage IIA
'TCGA-A8-A083-01'	0.0248615	1	M0	N0	T3	Stage IIB
'TCGA-B6-A0RL-01'	0.024886	1	M0	N0 (i-)	T2	Stage IIA
'TCGA-AR-A24Z-01'	0.0249098	1	M0	N0	T2	Stage IIA
'TCGA-A2-A0ET-01'	0.0250369	1	M0	N2a	T2	Stage IIIA
'TCGA-E2-A10B-01'	0.0250927	1	M0	N1a	T2	Stage IIB
'TCGA-AN-A0FZ-01'	0.025286	1	M0	N2	T2	Stage IIIA
'TCGA-EW-A1P5-01'	0.0253134	1	M0	N1a	T2	Stage IIB
'TCGA-AC-A23H-01'	0.0253555	1	M0	NX	T2	Stage IIA
'TCGA-A2-A0D4-01'	0.0256093	1	M0	N1a	T2	Stage IIB
'TCGA-A8-A085-01'	0.02577	1	M0	N1a	T2	Stage IIB
'TCGA-E2-A15S-01'	0.0259558	1	M0	N1	T2	Stage IIB
'TCGA-C8-A133-01'	0.0260559	1	M0	N1	T3	Stage IIIA
'TCGA-BH-A0HW-01'	0.0260954	1	M0	N0 (i-)	T1c	Stage IA
'TCGA-A8-A081-01'	0.0261558	1	M0	N0	T2	Stage IIA
'TCGA-AN-A0AK-01'	0.0261622	1	M0	N0	T2	Stage IIA
'TCGA-B6-A0I8-01'	0.0262229	1	M0	NX	T1	Stage X
'TCGA-C8-A1HM-01'	0.0262908	1	M0	N0	T2	Stage IIA
'TCGA-E2-A1IE-01'	0.0263047	1	M0	N1	T2	Stage IIB
'TCGA-A2-A0ER-01'	0.0263867	1	M0	N1mi	T1c	Stage IB
'TCGA-C8-A26Z-01'	0.0267943	1	M0	N0	T2	Stage IIA
'TCGA-E9-A5UO-01'	0.0268785	1	M0	N0	T2	Stage IIA
'TCGA-A2-A1FW-01'	0.0270034	1	M0	N2a	T3	Stage IIIA
'TCGA-LL-A442-01'	0.02704	1	MX	N0 (i-)	T2	Stage IIA
'TCGA-B6-A0I9-01'	0.0270461	1	M1	NX	T3	Stage IV
TCGA-BH-A0C7-01'	0.0270707	1	M0	N1mi	T2	Stage IIB
'TCGA-E2-A106-01'	0.0272135	1	M0	N1mi	T1c	Stage IB
'TCGA-BH-A18R-01'	0.02724	1	M0	N1	T2b	Stage IIA
'TCGA-A2-A0CW-01'	0.0273054	1	M0	N1a	T2	Stage IIB
'TCGA-BH-A0HL-01'	0.0273538	1	M0	N1a	T2	Stage IIB
'TCGA-B6-A0X5-01'	0.0275508	1	M0	N1b	T2	Stage IIB
'TCGA-A8-A09E-01'	0.0277408	1	M0	N1a	T4b	Stage IIIB
'TCGA-D8-A140-01'	0.0278904	1	M0	N1a	T2	Stage IIB
'TCGA-AR-A0TZ-01'	0.0279113	1	M1	N2	T2	Stage IIIA
'TCGA-BH-A0DD-01'	0.0279841	1	M0	N1a	T2	Stage IIB
'TCGA-EW-A1J1-01'	0.0279844	1	M0	N1a	T2	Stage IIB
'TCGA-D8-A27W-01'	0.0279857	1	M0	N0	T4b	Stage IIIB
'TCGA-S3-A6ZH-01'	0.0280198	1	MX	N3a	T3	Stage IIIC
'TCGA-B6-A0RO-01'	0.0282	1	M0	N1a	T4	Stage IIIB
'TCGA-E2-A109-01'	0.0284128	1	M0	N0 (i-)	T2	Stage IIA
'TCGA-A2-A25C-01'	0.0284249	1	M0	N1a	T2	Stage IIB
'TCGA-C8-A1HK-01'	0.0285155	1	M0	N1	T2	Stage IIB
'TCGA-C8-A12U-01'	0.0286161	1	M0	N1	T2	Stage IIB
'TCGA-D8-A1XG-01'	0.0287353	1	M0	N1a	T4b	Stage IIIB
'TCGA-B6-A1KN-01'	0.0288059	1	M0	N1	T4b	Stage IIIB
'TCGA-AR-A0U3-01'	0.0288131	1	M0	N1	T2	Stage IIB
'TCGA-AR-A0TY-01'	0.0288136	1	M0	N0	T2	Stage IIA
'TCGA-3C-AAAU-01'	0.028884	1	MX	NX	TX	Stage X
'TCGA-EW-A6SA-01'	0.0289297	1
'TCGA-A8-A07Z-01'	0.0289535	1	M0	N0	T2	Stage IIA
'TCGA-A8-A06Y-01'	0.0290213	1	M0	N0	T2	Stage IIA
'TCGA-AR-A1AV-01'	0.0290396	1	M0	N1	T2	Stage IIB
'TCGA-A2-A0YF-01'	0.0290639	1	M0	N0 (i+)	T1b	[Discrepancy]
'TCGA-E2-A15G-01'	0.0291845	1	M0	N0	T2	Stage IIA
'TCGA-D8-A1XA-01'	0.0292975	1	M0	N0	T1c	Stage IA
'TCGA-C8-A12X-01'	0.0293408	1	M0	N1	T2	Stage IIB
'TCGA-A8-A06U-01'	0.029383	1	M0	N1a	T2	Stage IIB
'TCGA-E2-A105-01'	0.0295973	1	M0	N0 (i-)	T2	Stage IIA
'TCGA-A2-A0CT-01'	0.0298547	1	M0	N0 (i-)	T2	Stage IIA
'TCGA-E9-A5UP-01'	0.0303068	1	M0	N0	T2	Stage IIA
'TCGA-E9-A1R2-01'	0.030583	1	MX	N3	T2	Stage IIIC
'TCGA-A7-A0D9-01'	0.0305947	1	M0	N0 (i-)	T2	Stage IIA
'TCGA-B6-A0RG-01'	0.0307171	1	M0	N0 (i-)	T3	Stage IIB
'TCGA-E2-A15A-06'	0.0308829	1	M0	N3a	T2	Stage IIIC
'TCGA-AN-A0FK-01'	0.0309032	1	M0	N0	T4	Stage IIIB
'TCGA-BH-A0BW-01'	0.0310865	1	M0	N0	T1c	Stage I
'TCGA-A2-A0EU-01'	0.0311746	1	M0	N0 (i-)	T1c	Stage IA
'TCGA-D8-A1JA-01'	0.0312235	1	M0	NX	T4b
'TCGA-A7-A13F-01'	0.0314325	1	M0	N1a	T3	Stage IIIA
'TCGA-A1-A0SQ-01'	0.0316013	1	MX	N1	T2	Stage IIB
'TCGA-A7-A4SF-01'	0.0319106	1	M0	N0	T2	Stage IIA
'TCGA-AO-A12H-01'	0.0319365	1	M0	N0 (i-)	T2	Stage IIA
'TCGA-AN-A041-01'	0.0321674	1	M0	N1a	T2	Stage IIB
'TCGA-D8-A27R-01'	0.0325206	1	M0	N3a	T2	Stage IIIC
'TCGA-A2-A0CU-01'	0.0325435	1	M0	N0 (i+)	T2	Stage IIA
'TCGA-E2-A14V-01'	0.0326478	1	M0	N1	T2	Stage IIB
'TCGA-BH-A0H9-01'	0.0326944	1	M0	N0 (i-)	T2	Stage IIA
'TCGA-C8-A12L-01'	0.0328241	1	M0	N0 (i-)	T2	Stage IIA
'TCGA-E2-A15E-06'	0.0329038	1	M0	N1a	T1c	Stage IIA
'TCGA-BH-A6R8-01'	0.0329653	1	M0	N0	T2	Stage IIA
'TCGA-A1-A0SJ-01'	0.0340089	1	M0	N1a	T3	Stage IIIA
'TCGA-AO-A03M-01'	0.0348366	1	M0	N0 (i-)	T1c	Stage I
'TCGA-S3-AA11-01'	0.0349093	1	M0	N0	T2	Stage IIA
'TCGA-E2-A14P-01'	0.0356535	1	M0	N3	T2	Stage IIIC
'TCGA-A8-A09C-01'	0.036129	1	MX	N0	T2	Stage X
'TCGA-5T-A9QA-01'	0.0362572	1	MX	NX	T2	Stage IIA
'TCGA-A8-A08L-01'	0.0363616	1	M0	N2a	T3	Stage IIIA
'TCGA-C8-A273-01'	0.0365699	1	M0	N1	T2	Stage IIB
'TCGA-B6-A0IO-01'	0.0367207	1	M0	N0 (i-)	T2	Stage IIA
'TCGA-EW-A1PF-01'	0.0376132	1	M0	N0	T1c	Stage IA
'TCGA-EW-A1OY-01'	0.0384633	1	MX	N0	T2	Stage IIA
'TCGA-AO-A03V-01'	0.0386094	1	M0	N0 (i-)	T1c	Stage I
'TCGA-E2-A1LB-01'	0.0389931	1	M0	N1	T2	Stage IIB
'TCGA-B6-A0IK-01'	0.0390911	1	M0	N1	T4	Stage IIIB
'TCGA-D8-A1JM-01'	0.039773	1	M0	N1a	T2	Stage IIB
'TCGA-A2-A0EY-01'	0.0404999	1	M0	N1a	T2	Stage IIB
'TCGA-UL-AAZ6-01'	0.0414709	1	MX	N0	T2	Stage IIA
'TCGA-A2-A0D1-01'	0.0428705	1	M0	N0 (i-)	T2	Stage IIA
'TCGA-BH-A0HN-01'	0.0434108	1	M0	N0 (i-)	T1c	Stage IA
'TCGA-BH-A1ES-06'	0.0434392	1	M0	N1a	T2	Stage IIB
'TCGA-A2-A04T-01'	0.043557	1	M0	N0 (i-)	T2	Stage IIA
'TCGA-OL-A5RZ-01'	0.0449853	1	MX	N0	T1b	Stage IA
'TCGA-AN-A04C-01'	0.045095	1	M0	N1	T2	Stage IIB
'TCGA-B6-A0IE-01'	0.0484579	1	M0	N1b	TX	Stage Tis
'TCGA-A8-A0A9-01'	0.131095	2	M0	N0	T2	Stage IIA
'TCGA-A8-A0AB-01'	0.131145	2	M0	N0	T2	Stage IIA
'TCGA-AO-A0J8-01'	0.131523	2	M0	N0 (i+)	T2	Stage IIA
'TCGA-AR-A2LL-01'	0.132444	2	M0	N0	T3	Stage IIB
'TCGA-BH-A1FL-01'	0.134246	2	M0	N1b	T2	Stage IIB
'TCGA-S3-A6ZG-01'	0.134556	2	M0	N1	T2	Stage IIB
'TCGA-A7-A3IZ-01'	0.136397	2	M0	N0 (i+)	T2	Stage IIA
'TCGA-E2-A15L-01'	0.13671	2	M0	N0	T2	Stage IIA
'TCGA-BH-A28Q-01'	0.13687	2	M0	N1a	T2	Stage IIB
'TCGA-A8-A09W-01'	0.137836	2	M0	N3	T2	Stage IIIB
'TCGA-A8-A07F-01'	0.138761	2	M0	N1a	T2	Stage IIB
'TCGA-A8-A09T-01'	0.138803	2	MX	N0	T1c	Stage X
'TCGA-LQ-A4E4-01'	0.139351	2	MX	N1a	T3	Stage IIIA
'TCGA-EW-A6SC-01'	0.139354	2
'TCGA-D8-A1X8-01'	0.141141	2	M0	N2a	T1c	Stage IIIA
'TCGA-AR-A1AT-01'	0.141558	2	M0	N0	T2	Stage IIA
'TCGA-D8-A27G-01'	0.141569	2	M0	N0	T2	Stage IIA
'TCGA-AR-A5QN-01'	0.14161	2	M0	N3	T2	Stage IIIC
'TCGA-AR-A24X-01'	0.14162	2	M0	N0	T2	Stage IIA
'TCGA-E2-A10F-01'	0.142473	2	M0	N0 (i-)	T2	Stage IIA
'TCGA-A8-A0A1-01'	0.142528	2	M0	N0	T2	Stage IIA
'TCGA-Z7-A8R6-01'	0.14318	2	M0	N0	T1c	Stage I
'TCGA-D8-A1Y1-01'	0.143384	2	MX	N1a	T3	Stage IIIA
'TCGA-BH-A209-01'	0.144931	2	M0	N0	T1c	Stage I
'TCGA-AN-A03Y-01'	0.145414	2	M0	N0	T2	Stage IIA
'TCGA-BH-A18F-01'	0.145756	2	M0	N0	T2	Stage IIA
'TCGA-D8-A3Z6-01'	0.145805	2	M0	N3a	T3	Stage IIIC
'TCGA-S3-AA17-01'	0.146042	2	cM0 (i+)	N1mi	T2	Stage IIB
'TCGA-GM-A3NW-01'	0.146719	2	M0	N0 (i-)	T2	Stage IIA
'TCGA-A2-A4RW-01'	0.146956	2	M0	N3a	T2	Stage IIIC
'TCGA-AC-A3EH-01'	0.147152	2
'TCGA-B6-A0RN-01'	0.147805	2	M0	N0 (i-)	T1c	Stage IA
'TCGA-BH-A0C1-01'	0.148163	2	M0	N2a	T3	Stage IIIA
'TCGA-AC-A6IX-01'	0.148199	2	MX	N3a	T2	Stage IIIC
'TCGA-D8-A27T-01'	0.148528	2	M0	N3a	T2	Stage IIIC
'TCGA-EW-A1OV-01'	0.148636	2	MX	N1mi	T2	Stage IIB
'TCGA-E2-A1L8-01'	0.148916	2	M0	N1a	T2	Stage IIA
'TCGA-A2-A0T4-01'	0.149078	2	M0	N0 (i-)	T2	Stage IIA
'TCGA-A8-A07B-01'	0.149916	2	M0	N0	T2	Stage IIA
'TCGA-AO-A12G-01'	0.149944	2	M0	N0 (i+)	T2	Stage IIA
'TCGA-B6-A0X7-01'	0.150448	2	MX	NX	T1c	Stage X
'TCGA-AC-A6IX-06'	0.150521	2	MX	N3a	T2	Stage IIIC
'TCGA-A8-A09X-01'	0.150552	2	M0	N3a	T2	Stage IIIC
'TCGA-A7-A3J1-01'	0.150653	2	MX	N0	T1c	Stage IA
'TCGA-E2-A2P6-01'	0.150736	2	M0	N1	T2	Stage IIB
'TCGA-A2-A0YD-01'	0.151077	2	M0	N0 (i+)	T3	Stage IIB
'TCGA-OL-A66K-01'	0.152269	2	MX	N0	T2	Stage IIA
'TCGA-A7-A4SA-01'	0.152534	2	M0	N1a	T2	Stage IIB
'TCGA-E2-A2P5-01'	0.15305	2	M0	N3	T2	Stage IIIC
'TCGA-4H-AAAK-01'	0.153977	2	M0	N2a	T2	Stage IIIA
'TCGA-A7-A4SC-01'	0.154156	2	MX	N0	T3	Stage IIB
'TCGA-AR-A5QM-01'	0.154174	2	M0	N0	T2	Stage IIA
'TCGA-AR-A2LM-01'	0.154425	2	M0	N1	T1	Stage II
'TCGA-OL-A5DA-01'	0.154453	2	MX	N0	T2	Stage IIA
'TCGA-S3-AA0Z-01'	0.154867	2	M0	N1a	T2	Stage IIB
'TCGA-A2-A0SY-01'	0.154872	2	M0	N1	T3	Stage IIIA
'TCGA-E2-A15M-01'	0.155291	2	M0	N0	T2	Stage IIA
'TCGA-D8-A27I-01'	0.155405	2	M0	N2a	T1c	Stage IIIA
'TCGA-AO-A0JJ-01'	0.155418	2	M0	N1a	T2	Stage IIB
'TCGA-A2-A25D-01'	0.155905	2	M0	N3a	T2	Stage IIIC
'TCGA-A7-A13H-01'	0.156269	2	MX	N1a	T2	Stage IIB
'TCGA-A2-A1FV-01'	0.156492	2	M0	N0 (i+)	T3	Stage IIB
'TCGA-BH-A0B2-01'	0.156571	2	M0	N0	T1a	Stage I
'TCGA-AR-A24T-01'	0.157265	2	M0	N3	T3	Stage IIIC
'TCGA-E9-A3HO-01'	0.157332	2	M0	N0 (i-)	T2	Stage IIA
'TCGA-OL-A66J-01'	0.157578	2	MX	N0	T1c	Stage I
'TCGA-A2-A0EX-01'	0.15806	2	M0	N0 (i+)	T3	Stage IIB
'TCGA-AC-A3HN-01'	0.158119	2	MX	N1a	T2	Stage IIB
'TCGA-EW-A1J2-01'	0.158498	2	MX	N1mi	T1c	Stage IIB
'TCGA-BH-A0HP-01'	0.158659	2	M0	N2a	T3	Stage IIIA
'TCGA-E2-A1IH-01'	0.158928	2	M0	N0	T1c	Stage I
'TCGA-B6-A40B-01'	0.159754	2	M0	N0 (i-)	T1b	Stage I
'TCGA-PE-A5DD-01'	0.159839	2	M0	N0	T2	Stage IIA
'TCGA-E2-A1IJ-01'	0.160142	2	M0	N0	T1c	Stage I
'TCGA-AC-A5XS-01'	0.160181	2	MX	N0	T2	Stage IIA
'TCGA-E2-A1B5-01'	0.160506	2	M0	N0	T2	Stage IIA
'TCGA-XX-A899-01'	0.160557	2	MX	N2a	T1c	Stage IIIA
'TCGA-A2-A0EN-01'	0.16201	2	M0	N0 (i+)	T2	Stage IIA
'TCGA-AQ-A7U7-01'	0.16207	2	M0	N2a	T2	Stage IIIA
'TCGA-AR-A24O-01'	0.163124	2	M0	N2	T3	Stage IIIA
'TCGA-A7-A6VV-01'	0.164273	2	M0	N0	T2	Stage IIA
'TCGA-5L-AAT1-01'	0.165009	2
'TCGA-AC-A6IV-01'	0.165421	2	MX	N1	T2	Stage IIB
'TCGA-BH-A18G-01'	0.166229	2	M0	N0	T1c	Stage IA
'TCGA-HN-A2OB-01'	0.167565	2	M0	N1	T2	Stage IIB
'TCGA-HN-A2NL-01'	0.168638	2	M0	N0	T2	Stage IIA
'TCGA-GM-A3XN-01'	0.16871	2	M0	N2a	T1c	Stage IIIA
'TCGA-AC-A2FF-01'	0.168965	2	MX	N1	T2	Stage IIB
'TCGA-AC-A2QH-01'	0.169456	2	MX	N0	T3	Stage IIB
'TCGA-LD-A74U-01'	0.169646	2	M0	N3a	T3	Stage IIIC
'TCGA-AO-A0JC-01'	0.169804	2	M0	N0 (i-)	T2	Stage IIA
'TCGA-A2-A0CK-01'	0.169879	2	M0	N2a	T3	Stage IIIA
'TCGA-S3-AA15-01'	0.170545	2	cM0 (i+)	N1a	T2	Stage IIB
'TCGA-AC-A8OS-01'	0.171074	2	MX	N0 (i-)	T2	Stage IIA
'TCGA-AO-A0J9-01'	0.171339	2	M0	N3	T2	Stage IIIC
'TCGA-E2-A3DX-01'	0.1717	2	M0	N3	T2	Stage IIIC
'TCGA-A2-A04U-01'	0.171842	2	M0	N0 (i+)	T2	Stage IIA
'TCGA-AN-A0FN-01'	0.172218	2	M0	N0	T1c	Stage IB
'TCGA-D8-A73U-01'	0.172641	2	M0	N0	T2	Stage IIA
'TCGA-A2-A0CO-01'	0.172869	2	M0	N0	T3	Stage IIB
'TCGA-BH-A8G0-01'	0.173389	2	M0	N1a	T2	Stage IIB
'TCGA-XX-A89A-01'	0.173609	2	MX	N0	T3	Stage IIB
'TCGA-GM-A5PX-01'	0.173733	2	M0	N1mi	T2	Stage IIB
'TCGA-AC-A23G-01'	0.17405	2	MX	N1	T1c	Stage IIA
'TCGA-A8-A08H-01'	0.174194	2	M0	N0	T2	Stage IIA
'TCGA-AC-A3W6-01'	0.175013	2	MX	N1	T3	Stage IIIA
'TCGA-LL-A9Q3-01'	0.175333	2	MX	N3a	T3	Stage IIIC
'TCGA-AR-A2LQ-01'	0.178771	2	M0	N0	T3	Stage IIB
'TCGA-AC-A3TN-01'	0.178833	2	MX	N0	T3	Stage IIB
'TCGA-LL-A440-01'	0.17911	2	MX	N0 (i-)	T1c	Stage IA
'TCGA-OL-A5S0-01'	0.180349	2	MX	N1a	T2	Stage IIB
'TCGA-A2-A0EP-01'	0.184036	2	M0	N0 (i+)	T1	Stage I
'TCGA-BH-A6R9-01'	0.185402	2	M0	N0	T2	Stage IIA
'TCGA-WT-AB44-01'	0.186109	2	MX	N0 (i-)	T1c	Stage IA
'TCGA-A2-A4S1-01'	0.186976	2	M0	N0	T2	Stage IIA
'TCGA-AC-A3QP-01'	0.190236	2	MX	N1mi	T2	Stage IIB
'TCGA-GM-A4E0-01'	0.191701	2	M0	N3a	T3	Stage IIIC
'TCGA-GI-A2C8-11'	0.19277	2	MX	N0	T4b	Stage IIIB
'TCGA-AC-A7VC-01'	0.193128	2	MX	N0	T3	Stage IIB
'TCGA-E9-A6HE-01'	0.193722	2	MX	N3	T3	Stage IIIC
'TCGA-LL-A5YL-01'	0.195213	2	MX	N1a	T2	Stage IIB
'TCGA-A7-A0CH-11'	0.196485	2	M0	N0 (i-)	T2	Stage IIA
'TCGA-BH-A1FE-06'	0.197319	2	M0	N1	T2	Stage IIB
'TCGA-E2-A576-01'	0.199796	2	MX	N0	T1c	Stage IA
'TCGA-E9-A1ND-11'	0.201215	2	M0	N1	T2	Stage IIB
'TCGA-OL-A66N-01'	0.201454	2	MX	N3	T3	Stage IIIC
'TCGA-E9-A5FK-01'	0.202002	2	M0	N3	T2	Stage IIIC
'TCGA-E2-A15K-11'	0.208489	2	M0	N1a	T2	Stage IIA
'TCGA-E9-A1RB-11'	0.215455	2	M0	N0	T2	Stage IIA
'TCGA-BH-A1FD-11'	0.216601	2	M0	N0	T1c	Stage I
'TCGA-BH-A1EN-11'	0.216662	2	M0	NX	T2	Stage IIA
'TCGA-A2-A0CR-01'	0.219823	2	M0	N0	T3	Stage IIB
'TCGA-AC-A2QJ-01'	0.224937	2	M0	N0	T4b	Stage IIIB
'TCGA-E2-A1BC-11'	0.224994	2	M0	N0	T1c	Stage IA
'TCGA-OL-A66L-01'	0.225623	2	MX	N0	T1c	Stage IA
'TCGA-AC-A3TM-01'	0.228823	2
'TCGA-E2-A158-11'	0.230244	2	M0	N1mi	T1c	Stage IIA
'TCGA-BH-A1EO-11'	0.234718	2	M0	N1	T1c	Stage IIA
'TCGA-E9-A1NG-11'	0.235098	2	M0	N0	T2	Stage IIA
'TCGA-A7-A13E-11'	0.235716	2	MX	N1	T2	Stage IIB
'TCGA-BH-A0DD-11'	0.248814	2	M0	N1a	T2	Stage IIB
'TCGA-E9-A1RD-11'	0.249829	2	M0	N0	T2	Stage IIA
'TCGA-E9-A3X8-01'	0.251937	2	M0	N1	T2	Stage IIB
'TCGA-A7-A0DB-11'	0.257825	2	M0	N0 (i-)	T2	Stage IIA
'TCGA-E9-A1RH-11'	0.258029	2	M0	N0	T2	Stage IIA
'TCGA-E9-A1R7-11'	0.26361	2	M0	N0	T2	Stage IIA
'TCGA-BH-A204-11'	0.263756	2	M0	N1b	T2	Stage IIB
'TCGA-E9-A1NF-11'	0.27167	2	M0	N0	T2	Stage IIA
'TCGA-E2-A15I-11'	0.272111	2	M0	N0	T2	Stage IIA
'TCGA-BH-A0B8-11'	0.276339	2	M0	N0 (i-)	T1b	Stage I
'TCGA-E2-A1LS-11'	0.276722	2	M0	N0	T1c	Stage IA
'TCGA-A7-A0D9-11'	0.279449	2	M0	N0 (i-)	T2	Stage IIA
'TCGA-BH-A0B5-11'	0.27948	2	M0	N2a	T2	Stage IIIA
'TCGA-E9-A1RC-11'	0.283131	2	M0	N3	T4b	Stage IIIC
'TCGA-A7-A13G-11'	0.293346	2	MX	N0	T2	Stage IIA
'TCGA-E9-A1RI-11'	0.30059	2	M0	N2	T1c	Stage IIIA
'TCGA-E9-A1RF-11'	0.303785	2	M0	N2	T2	Stage IIIA
