# Supplementary material for: PCB: A pseudotemporal causality-based Bayesian approach to identify EMT-associated regulatory relationships of AS events and RBPs during breast cancer progression
Source: PLoS Comput Biol. 2023 Mar 17;19(3):e1010939. doi: 10.1371/journal.pcbi.1010939 (PMC10057809; doi:10.1371/journal.pcbi.1010939)
Supplement: S8 Table — (XLSX) [file pcbi.1010939.s011.xlsx]

## Sheet: RBP_E
	hnRNPM	ESRP1	ESRP2
hnRNPM	0	0	0
ESRP1	0	0	0
ESRP2	0	0	0

## Sheet: RBP_M
	hnRNPM	ESRP1	ESRP2
hnRNPM	0	6.3275	0
ESRP1	0	0	0
ESRP2	0	0	0

## Sheet: AS_E
	CD44_1	CD44_2	CD44_3	CD44_5	CD44_6	CD44_7	CD44_9
CD44_1	0	0	0	0	0	0	0
CD44_2	0	0	0	0	0	0	0
CD44_3	0	0	0	0	0	0	0
CD44_5	0	0	0	0	0	0	0
CD44_6	0	0	0	0	0	0	0
CD44_7	0	0	0	0	0	0	0
CD44_9	0	0	0	0	0	0	0
hnRNPM	0	0	0	0	0	0	0
ESRP1	0	0	0	0.3372	0	0	0
ESRP2	0	0	0	0	0	0	0

## Sheet: AS_M
	CD44_1	CD44_2	CD44_3	CD44_5	CD44_6	CD44_7	CD44_9
CD44_1	0	0	0	0	0	0	0
CD44_2	0	0	0	0	0	0	0
CD44_3	0	0	0	0	0	0	0
CD44_5	0	0	0	0	0	0	0
CD44_6	0	0	0	0	0	0	0
CD44_7	0	0	0	0	0	0	0
CD44_9	0	0	0	0	0	0	0
hnRNPM	0	0	0.5681	0	0	0	0
ESRP1	0	0	0	0	0	0	0
ESRP2	0	0	-0.7717	0	0	0	0
